1 **Predicting individual skill learning, a cautionary tale**

2 Dekel Abeles<sup>1</sup>, Jasmine Hertzage<sup>2</sup>, Moni Shahar<sup>3</sup>, Nitzan Censor<sup>1,2</sup>

3 1. School of Psychological Sciences, Tel Aviv University, Tel Aviv 69978, Israel

4 2. Sagol School of Neuroscience, Tel Aviv University, Tel Aviv 69978, Israel

5 3. AI and Data Science Center of Tel-Aviv University (TAD), Tel Aviv 69978, Israel

6

7 **Abstract**

8 People show vast variability in skill learning. What determines a person's individual learning  
9 ability? In this study we explored the possibility to predict participants' future learning, based  
10 on their behavior during initial skill acquisition. We recruited a large online multi-session  
11 sample of participants performing a sequential tapping skill learning task. We trained machine  
12 learning models to predict future skill learning from raw data acquired during initial skill  
13 acquisition, and from engineered features calculated from the raw data. While the models did  
14 not explain learning, strong correlations were observed between initial and final performance.  
15 In addition, the results suggest that in correspondence with other empirical fields testing  
16 human behavior, canonical experimental tasks developed and selected to detect average  
17 effects may constrain insights regarding individual variability, relevant for real-life scenarios.  
18 Overall, implementing machine learning tools on large-scale data sets may provide a powerful  
19 approach towards revealing what differentiates between high and low innate learning abilities,  
20 paving the way for learning optimization techniques which may generalize beyond motor skill  
21 learning to broad learning abilities.

22

23 Keywords: human skill acquisition, motor learning, individual differences, sequence learning,  
24 machine learning

25

26

27

## 28 **Introduction**

29 People vary substantively in their ability to execute daily skills. What are the sources of such  
30 variability? Most studies have focused on initial and online task performance, known to vary  
31 between individuals (Anderson, Lohse, Lopes, & Williams, 2021). Thus, with no prior practice,  
32 some individuals might exhibit outstanding performance, while others might express slow and  
33 inaccurate performance. Importantly, people vary greatly in their ability to learn new skills as  
34 well, with the range of possible improvement differing between individuals. Predicting learning  
35 based on early skill acquisition offers an abundance of benefits and may be useful for effective  
36 adjustment of training regimes in daily life and for neurorehabilitation. What determines  
37 individual differences in learning abilities? Here, we aimed to investigate individual differences  
38 in skill learning by predicting the amount of learning an individual will exhibit across different  
39 time intervals, based on information extracted from performance at an early session.

40 Investigating individual differences with complex statistical modeling requires a large pool of  
41 participants. Therefore to address this question, we leveraged online platforms enabling  
42 crowdsourced recruitment producing large-scale data sets (Chandler & Shapiro, 2016; Ranard  
43 et al., 2014). Furthermore, the combination of such online platforms along the recent rise of  
44 machine learning models as means to understand rich data sets in neuroscience (Richards et al.,  
45 2019), provides a unique opportunity to investigate individual differences in skill learning.

46 To predict the extent of learning from skill acquisition characteristics, we utilized a common  
47 motor sequence learning task, widely used to model human skill acquisition (Brown &  
48 Robertson, 2007; Cohen, Pascual-Leone, Press, & Robertson, 2005; Genzel et al., 2012; Karni et  
49 al., 1998; Muellbacher et al., 2002; Perez et al., 2007; Reis et al., 2009; Robertson, Pascual-  
50 Leone, & Press, 2004; Wiestler & Diedrichsen, 2013; Wu, Srinivasan, Kaur, & Cramer, 2014).  
51 Thus, we conducted a large-scale crowdsourced experiment, recruiting online participants to  
52 take part in 3 learning sessions, with a retention session following one week, and an additional  
53 long-term retention session following 2-4 months. First, we validated that online participation  
54 demonstrates common learning rates within each session as well as between sessions offline  
55 gains (Karni et al., 1995; Lugassy, Herszage, Pilo, Brosh, & Censor, 2018; Robertson et al., 2004).  
56 Next, we applied a wide array of machine learning models based on engineered features  
57 derived from existing literature of motor skill learning, as well as models based on raw data,  
58 using machine extracted features with no involvement of prior knowledge.

59

## 60 **Methods**

61 *Participants*

62 Participants were recruited online from the Amazon Mechanical Turk platform  
63 (<https://www.mturk.com>). Qualifications for registered MTurk workers to participate in the first  
64 session of the experiment were: above 95% approval rate in previous MTurk assignments,  
65 currently located in the USA, right-handed, and did not previously participate in a sequential  
66 tapping task from our lab. Each of the following sessions were made available to qualified  
67 participants according to the predefined scheduling scheme and was available for 12 hours.  
68 Data were collected using non overlapping batches of participants – session 1 of the  
69 experiment was made available on a Monday and the next sessions accordingly. This resulted in  
70 the following number of participants per session: Session 1: 571 participants, Session 2: 334,  
71 Session 3: 273, Session 4: 195, Session 5: 103. Additional exclusion criteria were enforced to  
72 make sure the remaining sample of participants were all attentive and complied with  
73 instructions (see below). This resulted in the final sample of: session 1: N=460; 274 Female;  
74 Mean age = 43.35, Std = 12.99; session 2: N=254; 154 Female; Mean age = 43.29, Std = 12.83;  
75 session 3: N=203; 116 Female; Mean age = 44.07, Std = 12.72; session 4: N=134; 75 Female;  
76 Mean age = 46.08, Std = 13.00; session 5: N=75; 39 Female; Mean age = 47.48, Std = 12.47. All  
77 participants used a button press to sign an online informed consent form presented at the  
78 beginning of each session. The payment scheme for all sessions was visible in the experiment  
79 page on the Mturk platform. To minimize dropouts, the compensation increased as sessions  
80 progressed (1.5\$, 2\$, 2.5\$, 2\$ for the shorter 4<sup>th</sup> Retention session, and 5\$ for the final long-  
81 term Retention session).

## 82 *Task*

83 Participants performed a procedural motor task - the sequence tapping task (Karni et al., 1995),  
84 a highly common task used in numerous motor learning studies (Albouy et al., 2012; Bönstrup,  
85 Iturrate, Hebart, Censor, & Cohen, 2020; Herszage, Sharon, & Censor, 2021; Rickard, Cai, Rieth,  
86 Jones, & Ard, 2008). Participants were instructed (using illustrative slides) to place their non-  
87 dominant left hand on their keyboard in a one-to-one correspondence between fingers and  
88 digit-numbers; pinky – #1, ring finger – #2, middle finger – #3, index finger – #4. They were  
89 instructed to repeatedly tap the requested pattern (4-1-3-2-4) as fast and as accurate as  
90 possible using their left hand for the entire trial duration (10 seconds). A 10 second count-down  
91 screen preceded each trial and served as a break. Feedback was provided in the form of dots,  
92 with each keypress adding an additional dot to the display, regardless of correctness. Except for  
93 the sequence itself, this was the only visible item on the screen during the trial. The experiment  
94 was programmed in Psychopy (Peirce et al., 2019) and was hosted on Pavlovia servers  
95 (<https://pavlovia.org/>).

## 96 *Experimental procedure*

97 Before the first session, participants reported their age, gender, education level, time of weekly  
98 engagement with musical instruments and time engaged in physical activities. Additionally, at  
99 the beginning of each session, participants were asked to report the duration and the quality of  
100 sleep on the night preceding that session. At the end of each session, as a simple attention  
101 check, participants were asked to report the hand they used to perform the task. The study  
102 initially comprised of 4 sessions - each consisting of 36 trials except for the Retention session  
103 (4th session) containing 9 trials. A fifth session, the long-term Retention session, was made  
104 available 2-4 months after the completion of the Retention session, and comprised of 36 trials,  
105 identical to the first 3 sessions (figure 1a).

#### 106 *Data analysis and machine learning feature engineering*

107 All analyses were performed using custom code written in python (Van Rossum & Drake Jr,  
108 1995). Data preprocessing and handling was done using the Numpy (Harris et al., 2020) and  
109 Pandas (McKinney, 2010) package. The machine learning pipeline was defined using Scikit-learn  
110 (Pedregosa et al., 2011) and Pytorch (Paszke et al., 2019). The Matplotlib (Hunter, 2007) and  
111 Seaborn (Waskom, 2021) libraries were used for data visualization. Statistical analysis was  
112 conducted using Pinguin (Vallat, 2018).

113 Participants were qualified to continue to the next session if they did not end the experiment  
114 mid-session and averaged at least 9 input characters per trial. Additionally, to validate  
115 participants' attention to the task, data were discarded from all sessions if participants were  
116 too slow to start the trial following a break (first input exceeded 2 seconds) or failed to respond  
117 in more than 5 trials per session. Next, if the reported sleep duration was outside of the  
118 acceptable range of 6-12 hours, the data from that session and all following sessions were  
119 discarded.

120 Performance was defined as the overall number of correct keypresses in a trial (Censor,  
121 Horovitz, & Cohen, 2014; de Beukelaar, Woolley, & Wenderoth, 2014; Herszage et al., 2021;  
122 Korman et al., 2007). Keypresses were deemed correct if they were part of the complete  
123 requested pattern (4-1-3-2-4). If the trial ended mid-pattern, all keypresses from the start of  
124 that pattern were also considered correct. To minimize the effects of fatigue, *learning* was  
125 defined as the difference between the average of the 3 best trials in each session.

126 The following statistics were extracted from each session for each participant: *start*  
127 *performance* was defined as the average of trials number 2 and 3 (trial 1 not included due to  
128 warm-up decrements) (Adams, 1952; Rickard et al., 2008). *End performance* was defined as the  
129 mean of the last 3 trials in a session. *Maximal and minimal performance* were defined as the  
130 mean of the 3 trials with highest/lowest performance within each session. *Offline gains* were  
131 defined as the difference between consecutive sessions i.e., the *start performance* in session  
132 n+1 was deduced from the *end performance*. *Continuity* was defined as the average of the

133 longest consecutive correct keypress of each trial across an entire session (Herszage et al.,  
134 2021). The *mean accuracy* was also computed for each participant in each session based on the  
135 average accuracies in all trials within the session. Additionally, the average response time of the  
136 first keypress of each trial across the session was defined as the *mean first RTs* and used as a  
137 proxy for estimating the level of attentiveness during the trial.

138 *Session dynamics*. Session performance, defined as number of correct keypresses per trial  
139 within a session, was fitted with a learning curve according to the following equation:

$$140 \quad T_n = T_1 n^{-l(n)}, l(n) = l + f_p + 1 - \exp(f_p(n^{f_p} - 1))$$

141 where  $T$  – the amount of correct keypresses,  $l$  – learning rate,  $f_p$  –  
142 fatigue paramter (Asadayoobi, Jaber, & Taghipour, 2021),  $n$  – trial number.

143 *Scipy.optimize.curve\_fit* (initial guess for parameters (0.5,0.2,0) all bounded between [0-1]) was  
144 used to find the optimal Parameters  $f_p$ ,  $l$  and  $T_1$  for each participant and session.

145 *End of session slopes*. A regression line (intercept and slope) was fitted for the number of  
146 correct trials for the last 15 trials in the session separately for each participant and session  
147 (excluding session 4, which included only 9 trials).

148 *Locally weighted scatterplot smoothing (lowess) features*. For each participant, the correct  
149 number of keypresses per trial were smoothed across the session using a non-parametric local  
150 regression (*statsmodel.api.nonparamateric.lowess*, *frac* = 0.5). Several features were extracted  
151 from the smoothed curve. First, we defined the regions of plateau on the curve as the longest  
152 streak of consecutive trials in which the derivative was below 0.25, meaning that the smoothed  
153 improvement between trials was less than a quarter of a keypress. The start and end of the  
154 plateau were defined as the first and last trials within this streak and the streak count was their  
155 difference. Additionally, the maximum of the smoothed curve and its index within the session  
156 (the trial in which it was achieved) were also extracted per participant and session.

157 *Within sequence consistency dynamics*. To derive a representation of within sequence dynamics  
158 we first extracted the response time of the last sequence in a correct pattern (the 5<sup>th</sup> input per  
159 sequence) in relation to the first input of the same sequence. This resulted in a vector of last  
160 keypress durations (locked to the first input of the sequence) for all correct sequences in the  
161 order of execution. To examine the consistency of this input over time we calculated the  
162 standard deviation over a running window of 10 consecutive inputs (*running RT consistency*).  
163 This running estimate was then fitted with a 3<sup>rd</sup> degree polynomial (using the *numpy.polyfit*  
164 function). The coefficients of this polynomial and the fit prediction error (root mean square  
165 error) were used as additional hand-crafted features which capture the pattern dynamics  
166 across the session for each participant.

167 *Pattern consistency trend.* To examine the amount of monotonicity apparent in the *running RT*  
168 *consistency* estimate, we used Spearman correlation with the corresponding vector of window  
169 number within the session. A high negative correlation suggests that a participant's strategy  
170 gradually converged to a stable pattern. A high positive correlation on the other hand, suggests  
171 a diverged strategy, entering correct sequences less consistently as time progressed.

172

### 173 *Machine learning modeling*

174 To test the predictive power of the behavior observed during initial training (session 1) on  
175 future learning induced by subsequent training sessions, three time intervals were examined: a)  
176 change in performance from the 1<sup>st</sup> session to the 2<sup>nd</sup> session. b) change in performance from  
177 the 1<sup>st</sup> session to the 3<sup>rd</sup> session. c) change in performance from the 1<sup>st</sup> session to the 4<sup>th</sup>  
178 retention session. Two additional time intervals were used to predict skill retention a) one week  
179 retention interval (from the 3<sup>rd</sup> session to the 4<sup>th</sup>) and b) a long-term retention interval (2-4  
180 months) (from the 4<sup>th</sup> session to the 5<sup>th</sup>). Note that the number of participants decreases as the  
181 experiment reached later sessions, hence the number of observations available for modeling of  
182 later intervals is smaller. Accordingly, different modeling approaches were used, as detailed  
183 below.

184 The first approach utilized the engineered features as predictors and examined a wide range of  
185 machine learning techniques. Specifically, we tested: two tree-based models: Random Forest  
186 regression (Ho, 1995) and Sequential Regression Trees using gradient boosting (Xgboost) (J. H.  
187 Friedman, 2001). Regularized regression (Elastic net (Zou & Hastie, 2005)) and a multi-layer  
188 perceptron (MLP (Haykin, 1994)). Due to the large number of potential predictors, and to avoid  
189 over-fitting of the training set, we tested these pipelines both with and without an additional  
190 preprocessing step of principle components analysis (PCA)-based dimensionality reduction.  
191 Each modeling pipeline started with a standard scaler, transforming the feature values into z-  
192 scores. We used grid search for hyper-parameters tuning of the algorithms and regularization  
193 parameters. Each set of hyper-parameters was optimized separately for each type of algorithm,  
194 predictors step and time interval. The best model was selected based on the average 5-fold  
195 cross validation (CV) score. For each model type and time interval, the model selection was  
196 done in stages. In each stage an additional set of predictors was introduced based on their  
197 complexity, starting with high level features (i.e., session dynamic parameters) and ending with  
198 the simplest features (performance per trial). Initially, only non-behavioral features were  
199 included (i.e., Age and Gender). Next, predictors were introduced in steps. In the 1<sup>st</sup> step  
200 parameters from the learning curve were introduced. The 2<sup>nd</sup> step included the parameters  
201 extracted to capture *Within sequence consistency dynamics* and the *pattern consistency trend*.  
202 The 3<sup>rd</sup> step included *Lowess based features*. The 4<sup>th</sup> step included *session statistics*. The 5<sup>th</sup>  
203 step included the micro-offline and micro-online features of the first 5 trials (Bönstrup et al.,

204 2019). And the 6<sup>th</sup> and final step, included the performance per trial for all trials in the session.  
205 For prediction purposes, normalization was done using the means and standard deviations of  
206 the variables in the training set. Additionally, we tested a recurrent Long Short-Term Memory  
207 (LSTM) network architecture in which the input was the most common end-point measure (de  
208 Beukelaar et al., 2014; Herszage & Censor, 2017; Herszage et al., 2021; Karni et al., 1995) of the  
209 task - the number of correct keypresses for each trial in the first session.

210 The second approach examined the prediction of future learning, based on all previous  
211 sessions. We used a linear regression model with correlation-based feature selection,  
212 introducing all available predictors at once and running a hyperparameters grid search on the  
213 number of selected features.

214 In the third approach, models were trained directly on raw data from the first session,  
215 predicting learning between the first and second training sessions. Task performance was  
216 represented as a binary image of size 4 x 7200, where rows represent the key identity (1-4) and  
217 columns represent the time where the key was pressed (in 50ms bins). For example, a key press  
218 on the key “3” performed 250ms after trial start, will have a value of 1 in the coordinate (3,5).  
219 We then trained a convolutional neural network to predict learning. Hyper parameters of the  
220 topology and the optimization parameters were tuned manually. Similarly, a convolution  
221 encoder-decoder based method was built using the above binary session image as input,  
222 geared to reproduce the same image with a compact embedding layer which is then used as  
223 features in a regression analysis.

#### 224 *Model evaluation*

225 The parameters that resulted in the best performance on the training-set for each model type  
226 and prediction interval were used to re-train the model on the entire training set and examine  
227 it on the 20% of hold-out data that was not accessible during training. The final score is thus the  
228 reported explained variance ( $R^2$ ) of the hold-out dataset.

#### 229 *Statistical analysis*

230 One sample t-tests were used to examine the statistical significance of the offline gains analysis.  
231 Correlational analyses were conducted using Pearson or Spearman correlation.

232

## 233 Results

234 We first validated that performance was consistent with previous studies employing the same  
235 task in laboratory settings (de Beukelaar et al., 2014; Herszage & Censor, 2017; Karni et al.,  
236 1998; Korman et al., 2007). Indeed, participants displayed typical learning curves (figure 1b),  
237 with significant learning expressed both within-session, and between-sessions as offline gains  
238 (Karni et al., 1998; Press, Casement, Pascual-Leone, & Robertson, 2005; Walker, Brakefield,  
239 Morgan, Hobson, & Stickgold, 2002) (figure 1c). Specifically, there were significant offline gains  
240 between sessions 1 and 2 ( $t(253) = 2.639, p = 0.009, \text{Cohen's } d = 0.126, CI = [0.36 \text{ } 2.45]$ ), and  
241 between sessions 2 and 3 ( $t(202) = 4.008, p < 0.001, \text{Cohen's } d = 0.191, CI = [1.08 \text{ } 3.16]$ ).  
242 Interestingly, even when the skill memory was tested following one week, additional offline  
243 gains were evident, with a significant improvement between session 3 and Retention session 4  
244 ( $t(133) = 3.154, p = 0.002, \text{Cohen's } d = 0.183, CI = [0.75 \text{ } 3.28]$ ). In addition, during the long term  
245 retention interval, lasting between 2-4 months (see *Methods*) a significant reduction in  
246 performance was observed (difference from Retention (4<sup>th</sup> session) to Long-term Retention (5<sup>th</sup>  
247 session):  $t(74) = -7.661, p < 0.001, \text{Cohen's } d = 0.722, CI = [-10.32 \text{ } -6.06]$ ), indicating a decay of  
248 the memory trace over a period of months. Overall, these results validate typical within and  
249 between session motor skill learning.

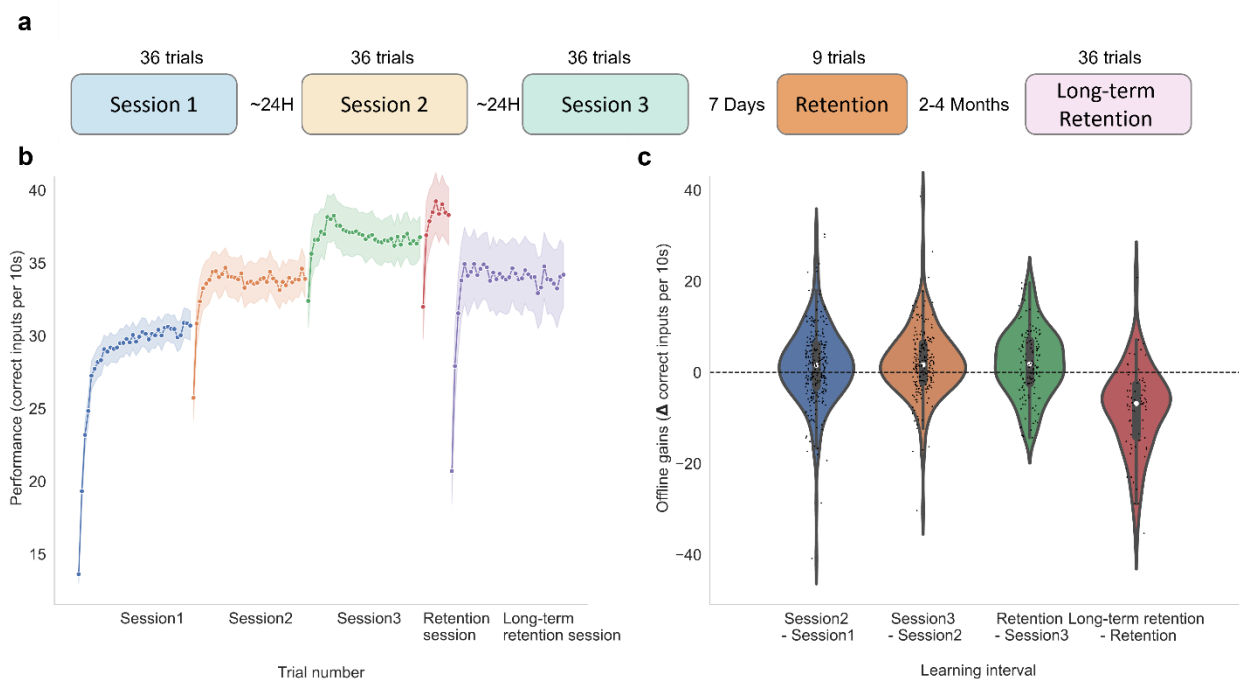

250

251 **Figure 1: Task performance within and between sessions.** a) Experimental design. b) Learning curves across all five  
252 sessions (session 1 – blue, session 2 – yellow, session 3 – green, Retention session – orange, Long Term Retention  
253 session – pink), the shaded area represents the 95% confidence interval. c) Offline gains between consecutive  
254 sessions. Data points in the violin plots represent offline gains for each participant. The white dot represents the  
255 median.



256 How could machine learning tools be applied to predict future learning? We first used ML with  
257 engineered features (see *Methods*), training discriminative algorithms to predict learning based  
258 on performance in the first session. To that end, our goal was to predict the improvements  
259 between performance in session 1 and performance in each of the subsequent sessions 2-4. To  
260 minimize within session effects of warm-up and fatigue (Adams, 1952; Rickard et al., 2008),  
261 between-session learning was quantified based on maximal performance in each session (see  
262 *Methods*). Potential predictors were introduced in steps with diminishing feature complexity,  
263 ranging from whole session dynamics descriptors, to the number of correct keypresses in each  
264 trial. The best performing model was selected based on its mean cross validation and tested on  
265 a predetermined hold-out set. Models did not predict learning in the hold-out set (*session2 -*  
266 *session1*:  $R^2_{mean\_cv\_score} = 0.08$ ,  $R^2_{test} = 0.15$ ; *session3 - session1*:  $R^2_{mean\_cv\_score} = 0.09$ ,  $R^2_{test} = -$   
267  $0.18$ ; *Retention session 4 - session1*:  $R^2_{mean\_cv\_score} = 0.01$ ,  $R^2_{test} = 0.07$ ) (Figure 2a). Of note, a  
268 negative  $R^2$  score indicates that model predictions do not explain any variance in the dependent  
269 variable.

270 Is behavior at initial stages of skill acquisition indicative of skill retention? To address this  
271 question, models were trained to predict the performance change during the short (from  
272 session 3 to Retention session) and long retention intervals (from Retention to Long-term  
273 retention), based on performance in either the first or all 3 prior sessions. The change in  
274 performance over both retention intervals was not predicted by the best performing model  
275 (highest cross validation score) as reflected in the negative  $R^2$  in the hold-out set (*Retention*  
276 *session - session3*:  $R^2_{mean\_cv\_score} = 0.11$ ,  $R^2_{test} = -0.84$ ; *Long-retention - Retention session*:  
277  $R^2_{mean\_cv\_score} = 0.10$ ,  $R^2_{test} = -0.65$ , figure 2b). Since the long-term retention interval showed  
278 negative changes in performance, further investigation of the data revealed that maximum  
279 performance in the Retention session was the best predictor for the subsequent long-term  
280 retention interval (Pearson's  $r(73) = -0.49$ ,  $p < 0.001$ ,  $CI = [-0.65, -0.30]$ ). Considering that  
281 maximum performance in the Retention session reflects both innate abilities and the overall  
282 benefit of training throughout the experiment, we examined the correlation between total  
283 learning and retention. Pearson correlation confirmed that the amount of total learning  
284 throughout the experiment (performance differences between session 1 and Retention session  
285 4) was even a stronger predictor of the change in performance (Pearson's  $r(73) = -0.58$ ,  
286  $p < 0.001$ ,  $CI = [-0.71, -0.40]$ ), suggesting that participants exhibit long-term decay of their own  
287 learning before the retention interval.

288

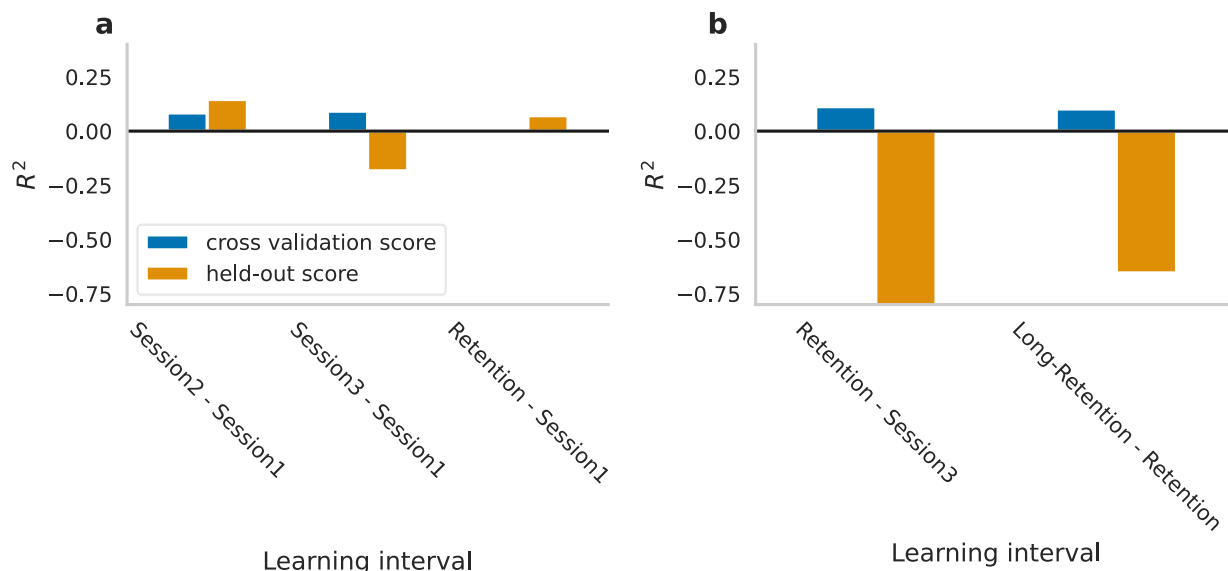

289

290 **Figure 2: Model performance with engineered features.** a) maximum mean cross-validation  $R^2$  scores (blue) and  
291 the corresponding hold-out  $R^2$  scores (orange) for each learning interval (X axis). b) Maximum mean cross-  
292 validation  $R^2$  scores (blue) and the corresponding hold out  $R^2$  (orange) for the two retention intervals (x axis).

293

294 Next, we tested whether a different approach of machine learning models, avoiding feature  
295 selection based on prior assumptions, will achieve better prediction of future learning. To  
296 further investigate prediction in that direction, we trained a convolutional neuronal network on  
297 data from session 1, represented as a binary matrix of size 4 x 7200, where rows represent key  
298 identity and columns represent keypress time within the session in 50ms time bins (Figure 3).  
299 This representation reflects the available raw data, without imposing any definition of key  
300 correctness. This analysis was focused on the prediction of learning between the first and the  
301 second session, which includes the largest pool of participants. Additionally, to better utilize all  
302 available data, evaluation of model performance was based solely on cross validation. The best  
303 model resulted in mean cross validation  $R^2_{test} = -0.049$ , std = 0.053 performance. Consistent with  
304 this result, two additional models, using a convolution based encoder-decoder and LSTM  
305 architectures (see *Methods*), did not show predictive power.

306

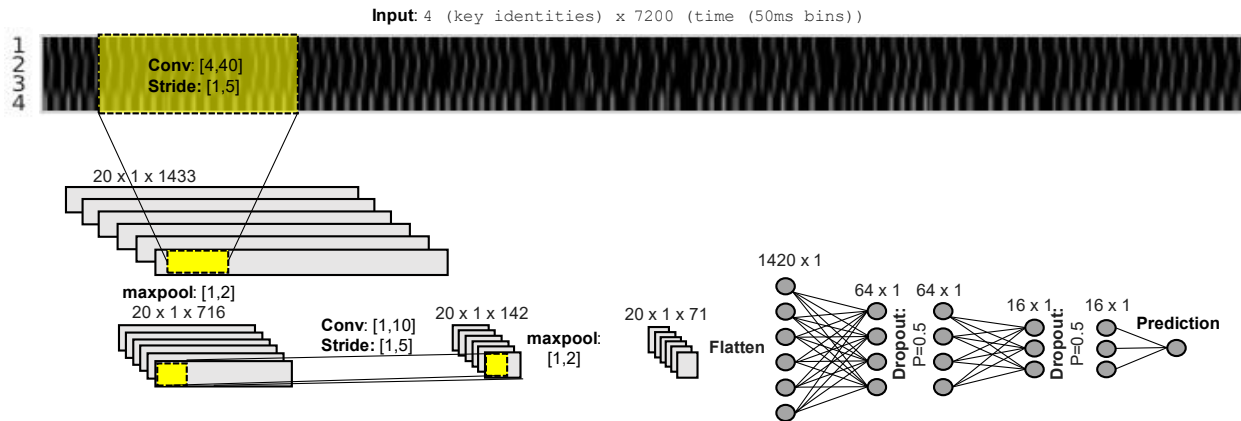

307

308 **Figure 3. Convolution based neural network architecture.** Input was represented as a 4 x 7200 binary matrix, where  
309 rows represent key identity (1-4) and columns represent time within the session (in 50ms time bins). The network  
310 architecture consists of two convolution layers, each followed by a pooling operation which is followed by 3 fully  
311 connected layers. The Rectified linear unit (Relu) was the selected activation function.

312

313 To further investigate the above results, we assessed the consistency of simple performance  
314 metrics in each session and between-session learning, using Pearson correlations. Performance  
315 in each session explained a large portion of the variance in Performance scores across the 3  
316 sessions and Retention session ( $R^2$  range = [0.25-0.91], all  $p < 0.001$ ; see figure 4a), indicating  
317 high test-retest reliability and thus a stable measure of individual performance. However,  
318 performance hardly explained any portion of the variance in learning ( $R^2$  range = [0.00,0.05];  
319 figure 4b). While these results suggest that variability in performance can be explained by  
320 performance in previous sessions, variability in learning can hardly be explained. To further  
321 illustrate this point, participants were separated into 5 quantile ranges (each spanning  
322 20%)(Stafford & Dewar, 2014) based on their maximum performance in the Retention session,  
323 plotted throughout the experiment (figure 4c). The plotted curves show that participant's relative  
324 performance remained stable throughout the experiment.

-12-

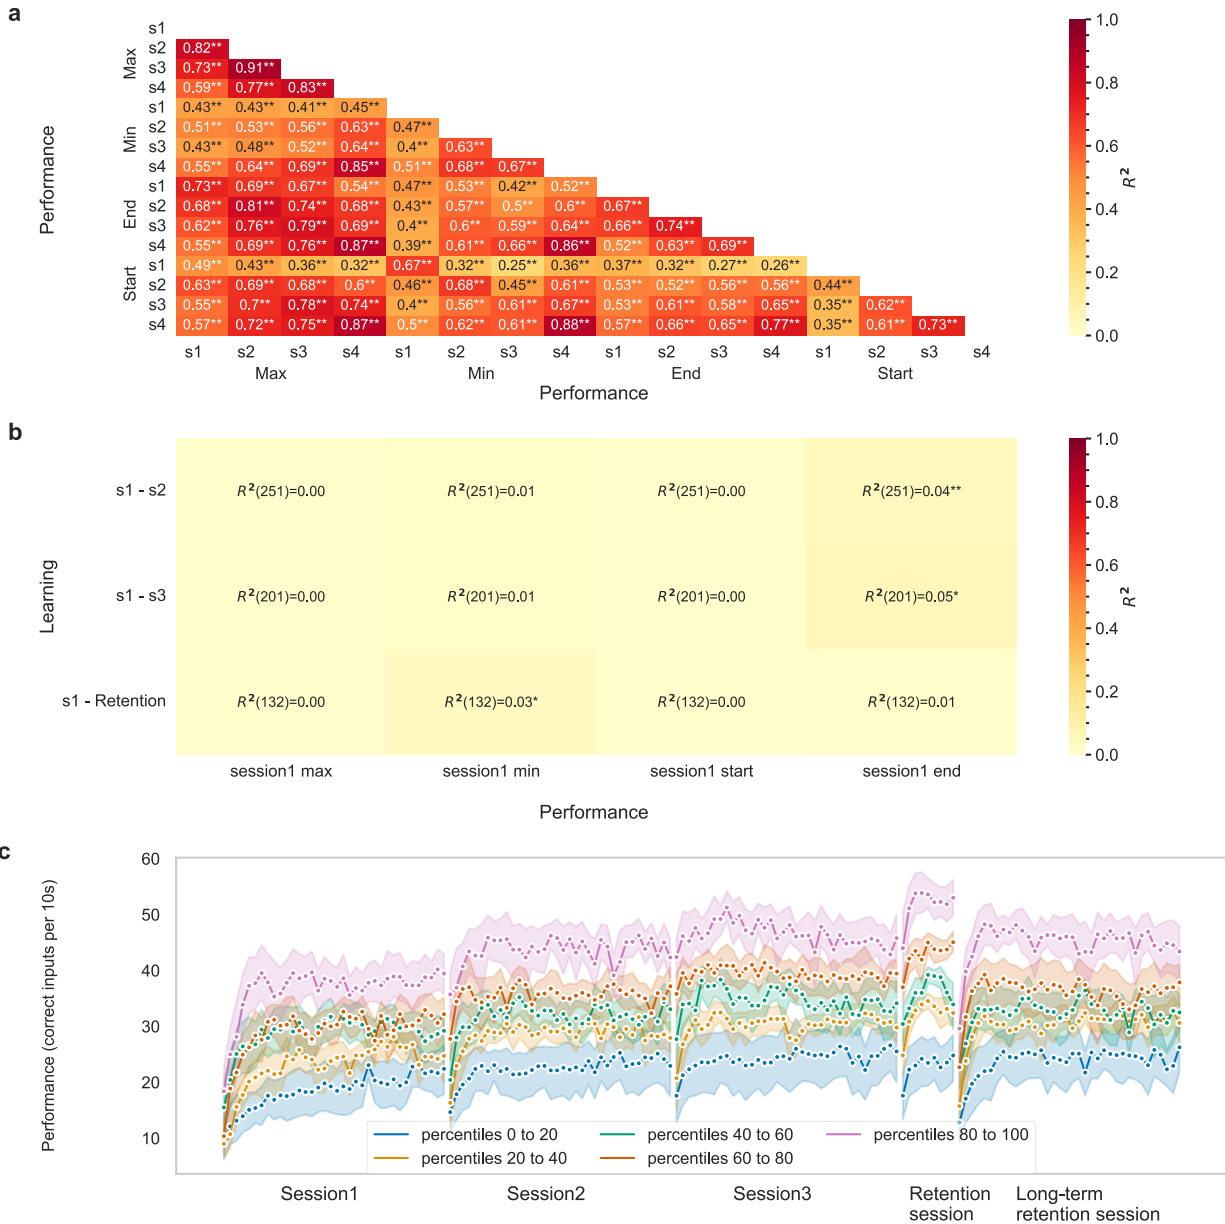

325

326 **Figure 4: Performance was consistent across sessions but did not predict learning.** a) Performance in all sessions  
 327 explains a large portion of the variability in performance ( $R^2$  range = [0.25, 0.91]). b) Performance hardly explains  
 328 the variability in learning ( $R^2$  range = [0, 0.05]). c) Performance throughout the experiment separated according to  
 329 the performance quantile in the Retention session (colors), showing that participants' relative performance rank  
 330 remains stable across sessions. Shaded areas represent the 95% confidence interval. Statistical significance is  
 331 marked with \* for  $p < 0.05$  and with \*\* for  $p < 0.001$

332

333

334

## 335 **Discussion**

336 The goal of this study was to identify what determines an individual's skill learning ability, based  
337 on their initial behavior during skill acquisition. Learning was measured at different intervals,  
338 using large-scale crowdsourced data. Results showed that performance in early sessions did not  
339 predict subsequent learning, while variability in performance was explained by performance in  
340 previous sessions. In addition, participants exhibited long-term skill memory decay, bound by  
341 their own learning before the retention interval.

342 Machine learning techniques were leveraged to predict learning, utilizing several families of  
343 algorithms relying both on manually engineered features and on raw data representations.  
344 First, we extracted various features from the observed behavior in the task, ranging from high  
345 level features such as the parameters of the learning curve, to simple features such as the  
346 correct number of keypress in a trial. The applied models cover a wide array of approaches:  
347 Random Forest regression and Xgboost use an ensemble of weak learners and aggregate their  
348 predictions either based on consensus (random forest regression) or in a sequential manner.  
349 Multi-layered Perceptron (MLP), on the other hand, is a simple deep learning architecture  
350 consisting only of fully connected layers. The main advantage of these algorithms is their ability  
351 to capture interactions and other non-linear effects between predictors without explicitly  
352 modeling them by creating new variables. Two linear regression techniques were also examined  
353 due to their straightforward interpretability. Specifically, ElasticNet uses both L1 (Lasso) and L2  
354 (Ridge) regularization penalties to limit model complexity while maintaining the linear relation  
355 between features and target. Finally, more sophisticated deep learning techniques were  
356 examined due to their ability to extract useful features from the data, without relying on expert  
357 knowledge and feature engineering.

358 A prerequisite of successful prediction of individual differences is a reliable test-retest metric  
359 for prediction (Spearman, 1961). This concept was demonstrated in other fields, such as the  
360 field of attentional control, where many canonical tasks, including Stroop (Stroop, 1935),  
361 Flanker (Eriksen & Eriksen, 1974), and Navon (Navon, 1977) result in robust between-conditions  
362 experimental effects, but in unreliable estimates of individual effects (Hedge, Powell, &  
363 Sumner, 2018), thus limiting insights regarding individual differences. Spearman and colleagues  
364 attributed this limitation to the calculation of a composite score as the difference between two  
365 measurements for the same individual (affecting test-retest reliability, Cronbach & Furby, 1970;  
366 Spearman, 1961). Critically, such differences between two measurements are the key outcome  
367 for evaluating skill learning. Therefore, while skill learning tasks have extensively shown robust  
368 and replicable results when examined between conditions (de Beukelaar et al., 2014; Gabitov et  
369 al., 2017; Herszage & Censor, 2017; Herszage et al., 2021; Korman et al., 2007), insights into  
370 individual differences may be limited. Accordingly, while large sample sizes may reduce  
371 standard errors and enable to detect average between-conditions effects, they do not

372 necessarily improve the reliability of individual effects. This issue could be addressed by  
373 increasing the number of repeated measures or trials for each participant, as done for example  
374 in studies of perceptual learning (Sagi, 2011).

375 Furthermore, our analysis revealed that separating participants into 5 groups based on their  
376 performance in the Retention session, resulted in a visible, consistent classification throughout  
377 all sessions, suggesting that future learning may be too small to change participants' rank.  
378 Participants showing higher performance at the beginning, will also result in better  
379 performance at the end of the experiment. These results are consistent with previous findings  
380 of a large online sample of participants playing a complex online shooter game (Stafford &  
381 Dewar, 2014). When participants were split into 5 quantile ranges based on their best  
382 performance the curves remained separated from the very beginning of the task. Development  
383 of novel model motor skill tasks with high variability in between-session learning, and in which  
384 future performance is not determined by initial performance, may overcome the above  
385 constraints and provide further insights regarding learning variability, important for real-life  
386 scenarios. These may be combined with potentially useful predictors from other domains  
387 (Ackerman, 1987; Anderson et al., 2021; Chen, Gully, Whiteman, & Kilcullen, 2000), functional  
388 and anatomical neuroimaging information (Tomassini et al., 2011), or high-resolution kinematic  
389 inputs (Friedman & Korman, 2012).

390 In correspondence with other empirical fields testing human behavior, canonical experimental  
391 tasks developed and selected to detect average effects may constrain insights regarding  
392 individual variability, relevant for real-life scenarios. Accordingly, development of novel tasks  
393 with high test-retest reliability which model real-life learning, may shed light on the underlying  
394 mechanisms of individual differences in skill learning and promote personalized learning  
395 regimes geared to enhance human performance. Consequently, collecting large online datasets  
396 of behaving participants combined with advanced machine learning approaches, holds great  
397 potential for modeling future learning based on easily observable behavior during initial  
398 training. In turn, this may allow efficient resource allocation and enhancement of training  
399 regimes tailored to each person according to their innate abilities.

400

#### 401 *Data and code availability*

402 All collected data and the code for analysis are available upon request.

403

404 **References**

- 405 Ackerman, P. L. (1987). Individual differences in skill learning: An integration of psychometric  
406 and information processing perspectives. *Psychological Bulletin*, *102*(1), 3.
- 407 Adams, J. A. (1952). Warm-up decrement in performance on the pursuit-rotor. *The American*  
408 *Journal of Psychology*, *65*(3), 404–414.
- 409 Albouy, G., Sterpenich, V., Vandewalle, G., Darsaud, A., Gais, S., Rauchs, G., ... Maquet, P.  
410 (2012). Neural correlates of performance variability during motor sequence acquisition.  
411 *NeuroImage*, *60*(1), 324–331. <https://doi.org/10.1016/j.neuroimage.2011.12.049>
- 412 Anderson, D. I., Lohse, K. R., Lopes, T. C. V., & Williams, A. M. (2021). Individual differences in  
413 motor skill learning: Past, present and future. *Human Movement Science*, *78*, 102818.
- 414 Asadayoobi, N., Jaber, M. Y., & Taghipour, S. (2021). A new learning curve with fatigue-  
415 dependent learning rate. *Applied Mathematical Modelling*, *93*, 644–656.  
416 <https://doi.org/10.1016/j.apm.2020.12.005>
- 417 Bönstrup, M., Iturrate, I., Hebart, M. N., Censor, N., & Cohen, L. G. (2020). Mechanisms of  
418 offline motor learning at a microscale of seconds in large-scale crowdsourced data. *Npj*  
419 *Science of Learning*, *5*(1), 1–10. <https://doi.org/10.1038/s41539-020-0066-9>
- 420 Bönstrup, M., Iturrate, I., Thompson, R., Cruciani, G., Censor, N., & Cohen, L. G. (2019). A rapid  
421 form of offline consolidation in skill learning. *Current Biology*, *29*(8), 1346–1351.
- 422 Brown, R. M., & Robertson, E. M. (2007). Inducing motor skill improvements with a declarative  
423 task. *Nature Neuroscience*, *10*(2), 148–149. <https://doi.org/10.1038/nn1836>
- 424 Censor, N., Horowitz, S. G., & Cohen, L. G. (2014). Interference with Existing Memories Alters  
425 Offline Intrinsic Functional Brain Connectivity. *Neuron*, *81*(1), 69–76.  
426 <https://doi.org/10.1016/j.neuron.2013.10.042>
- 427 Chandler, J., & Shapiro, D. (2016). Conducting clinical research using crowdsourced convenience  
428 samples. *Annual Review of Clinical Psychology*, *12*, 53–81.
- 429 Chen, G., Gully, S. M., Whiteman, J.-A., & Kilcullen, R. N. (2000). Examination of relationships  
430 among trait-like individual differences, state-like individual differences, and learning  
431 performance. *Journal of Applied Psychology*, *85*(6), 835.
- 432 Cohen, D. A., Pascual-Leone, A., Press, D. Z., & Robertson, E. M. (2005). Off-line learning of  
433 motor skill memory: a double dissociation of goal and movement. *Proceedings of the*  
434 *National Academy of Sciences of the United States of America*, *102*(50), 18237–18241.
- 435 Cronbach, L. J., & Furby, L. (1970). How we should measure "change": Or should we?

- 436 *Psychological Bulletin*, 74(1), 68.
- 437 de Beukelaar, T. T., Woolley, D. G., & Wenderoth, N. (2014). Gone for 60 seconds: Reactivation  
438 length determines motor memory degradation during reconsolidation. *Cortex*, 59, 138–  
439 145. <https://doi.org/10.1016/j.cortex.2014.07.008>
- 440 Eriksen, B., & Eriksen, C. W. (1974). Effects of noise letters upon the identification of a target  
441 letter in a nonsearch task\*. *Perception & Psychophysics*, 16(1), 143–149.
- 442 Friedman, J. H. (2001). Greedy function approximation: a gradient boosting machine. *Annals of*  
443 *Statistics*, 1189–1232.
- 444 Friedman, J., & Korman, M. (2012). Kinematic strategies underlying improvement in the  
445 acquisition of a sequential finger task with self-generated vs. cued repetition training. *PLoS*  
446 *One*, 7(12), e52063.
- 447 Gabitov, E., Boutin, A., Pinsard, B., Censor, N., Fogel, S. M., Albouy, G., ... Doyon, J. (2017). Re-  
448 stepping into the same river: competition problem rather than a reconsolidation failure in  
449 an established motor skill. *Scientific Reports*, 7(1), 9406. <https://doi.org/10.1038/s41598-017-09677-1>
- 451 Genzel, L., Quack, A., Jager, E., Konrad, B., Steiger, A., & Dresler, M. (2012). Complex motor  
452 sequence skills profit from sleep. *Neuropsychobiology*, 66(4), 237–243.  
453 <https://doi.org/10.1159/000341878>
- 454 Harris, C. R., Millman, K. J., van der Walt, S. J., Gommers, R., Virtanen, P., Cournapeau, D., ...  
455 Oliphant, T. E. (2020). Array programming with {NumPy}. *Nature*, 585(7825), 357–362.  
456 <https://doi.org/10.1038/s41586-020-2649-2>
- 457 Haykin, S. (1994). *Neural networks: a comprehensive foundation*. Prentice Hall PTR.
- 458 Hedge, C., Powell, G., & Sumner, P. (2018). The reliability paradox: Why robust cognitive tasks  
459 do not produce reliable individual differences. *Behavior Research Methods*, 50(3), 1166–  
460 1186. <https://doi.org/10.3758/s13428-017-0935-1>
- 461 Herszage, J., & Censor, N. (2017). Memory Reactivation Enables Long-Term Prevention of  
462 Interference. *Current Biology : CB*, 27(10), 1529-1534.e2.  
463 <https://doi.org/10.1016/j.cub.2017.04.025>
- 464 Herszage, J., Sharon, H., & Censor, N. (2021). Reactivation-induced motor skill learning.  
465 *Proceedings of the National Academy of Sciences of the United States of America*, 118(23),  
466 1–6. <https://doi.org/10.1073/PNAS.2102242118>
- 467 Ho, T. K. (1995). Random decision forests. In *Proceedings of 3rd international conference on*



- 468 *document analysis and recognition* (Vol. 1, pp. 278–282).
- 469 Hunter, J. D. (2007). Matplotlib: A 2D graphics environment. *Computing in Science &*  
470 *Engineering*, 9(3), 90–95. <https://doi.org/10.1109/MCSE.2007.55>
- 471 Karni, A., Meyer, G., Jezard, P., Adams, M. M., Turner, R., & Ungerleider, L. G. (1995).  
472 Functional MRI evidence for adult motor cortex plasticity during motor skill learning.  
473 *Nature*, 377(6545), 155–158. <https://doi.org/10.1038/377155a0>
- 474 Karni, A., Meyer, G., Rey-Hipolito, C., Jezard, P., Adams, M. M., Turner, R., & Ungerleider, L. G.  
475 (1998). The acquisition of skilled motor performance: fast and slow experience-driven  
476 changes in primary motor cortex. *Proceedings of the National Academy of Sciences of the*  
477 *United States of America*, 95(3), 861–868. <https://doi.org/10.1073/pnas.95.3.861>
- 478 Korman, M., Doyon, J., Doljansky, J., Carrier, J., Dagan, Y., & Karni, A. (2007). Daytime sleep  
479 condenses the time course of motor memory consolidation. *Nature Neuroscience*, 10(9),  
480 1206–1213. <https://doi.org/10.1038/nn1959>
- 481 Lugassy, D., Herszage, J., Pilo, R., Brosh, T., & Censor, N. (2018). Consolidation of complex motor  
482 skill learning: Evidence for a delayed offline process. *Sleep*, 41(9), zsy123.  
483 <https://doi.org/10.1093/sleep/zsy123>
- 484 McKinney, W. (2010). Data structures for statistical computing in Python. In S. van der  
485 Walt & J. Millman (Eds.), *Proceedings of the 9th Python in Science Conference* (pp.  
486 56–61). <https://doi.org/10.25080/Majora-92bf1922-00a>
- 487 Muellbacher, W., Ziemann, U., Wissel, J., Dang, N., Kofler, M., Facchini, S., ... Hallett, M. (2002).  
488 Early consolidation in human primary motor cortex 3. *Nature*, 415(0028-0836 (Print)),  
489 640–644. <https://doi.org/10.1038/nature712>
- 490 Navon, D. (1977). Forest before trees: The precedence of global features in visual perception.  
491 *Cognitive Psychology*, 9(3), 353–383. [https://doi.org/10.1016/0010-0285\(77\)90012-3](https://doi.org/10.1016/0010-0285(77)90012-3)
- 492 Paszke, A., Gross, S., Massa, F., Lerer, A., Bradbury, J., Chanan, G., ... Chintala, S. (2019).  
493 PyTorch: An imperative style, high-performance deep learning library. (H. Wallach, H.  
494 Larochelle, A. Beygelzimer, F. d\textquotesingle Alché-Buc, E. Fox, & R. Garnett, Eds.),  
495 *Advances in Neural Information Processing Systems*. Curran Associates, Inc. Retrieved from  
496 [http://papers.neurips.cc/paper/9015-pytorch-an-imperative-style-high-performance-](http://papers.neurips.cc/paper/9015-pytorch-an-imperative-style-high-performance-deep-learning-library.pdf)  
497 [deep-learning-library.pdf](http://papers.neurips.cc/paper/9015-pytorch-an-imperative-style-high-performance-deep-learning-library.pdf)
- 498 Pedregosa, F., Varoquaux, G., Gramfort, A., Michel, V., Thirion, B., Grisel, O., ... Duchesnay, É.  
499 (2011). Scikit-learn: Machine Learning in Python. *Journal of Machine Learning Research*,  
500 12(85), 2825–2830. Retrieved from <http://jmlr.org/papers/v12/pedregosa11a.html>

- 501 Peirce, J., Gray, J. R., Simpson, S., MacAskill, M., Höchenberger, R., Sogo, H., ... Lindeløv, J. K.  
502 (2019). PsychoPy2: Experiments in behavior made easy. *Behavior Research Methods*, 51(1),  
503 195–203. <https://doi.org/10.3758/s13428-018-01193-y>
- 504 Perez, M. A., Tanaka, S., Wise, S. P., Sadato, N., Tanabe, H. C., Willingham, D. T., & Cohen, L. G.  
505 (2007). Neural Substrates of Intermanual Transfer of a Newly Acquired Motor Skill. *Current*  
506 *Biology*, 17(21), 1896–1902. <https://doi.org/10.1016/j.cub.2007.09.058>
- 507 Press, D. Z., Casement, M. D., Pascual-Leone, A., & Robertson, E. M. (2005). The time course of  
508 off-line motor sequence learning. *Cognitive Brain Research*, 25(1), 375–378.
- 509 Ranard, B. L., Ha, Y. P., Meisel, Z. F., Asch, D. A., Hill, S. S., Becker, L. B., ... Merchant, R. M.  
510 (2014). Crowdsourcing—harnessing the masses to advance health and medicine, a  
511 systematic review. *Journal of General Internal Medicine*, 29(1), 187–203.
- 512 Reis, J., Schambra, H. M., Cohen, L. G., Buch, E. R., Fritsch, B., Zarahn, E., ... Krakauer, J. W.  
513 (2009). Noninvasive cortical stimulation enhances motor skill acquisition over multiple  
514 days through an effect on consolidation. *Proceedings of the National Academy of Sciences*  
515 *of the United States of America*, 106(5), 1590–1595.  
516 <https://doi.org/10.1073/pnas.0805413106>
- 517 Richards, B. A., Lillicrap, T. P., Beaudoin, P., Bengio, Y., Bogacz, R., Christensen, A., ... Ganguli, S.  
518 (2019). A deep learning framework for neuroscience. *Nature Neuroscience*, 22(11), 1761–  
519 1770.
- 520 Rickard, T. C., Cai, D. J., Rieth, C. A., Jones, J., & Ard, M. C. (2008). Sleep Does Not Enhance  
521 Motor Sequence Learning. <https://doi.org/10.1037/0278-7393.34.4.834>
- 522 Robertson, E. M., Pascual-Leone, A., & Press, D. Z. (2004). Awareness Modifies the Skill-Learning  
523 Benefits of Sleep. *Current Biology*, 14(3), 208–212. [https://doi.org/10.1016/S0960-](https://doi.org/10.1016/S0960-9822(04)00039-9)  
524 [9822\(04\)00039-9](https://doi.org/10.1016/S0960-9822(04)00039-9)
- 525 Sagi, D. (2011). Perceptual learning in Vision Research. *Vision Research*, 51(13), 1552–1566.  
526 <https://doi.org/https://doi.org/10.1016/j.visres.2010.10.019>
- 527 Spearman, C. (1961). The proof and measurement of association between two things.
- 528 Stafford, T., & Dewar, M. (2014). Tracing the Trajectory of Skill Learning With a Very Large  
529 Sample of Online Game Players. *Psychological Science*, 25(2), 511–518.  
530 <https://doi.org/10.1177/0956797613511466>
- 531 Stroop, J. R. (1935). Studies of interference in serial verbal reactions. *Journal of Experimental*  
532 *Psychology*, 18(6), 643–662. <https://doi.org/10.1037/h0054651>

- 533 Tomassini, V., Jbabdi, S., Kincses, Z. T., Bosnell, R., Douaud, G., Pozzilli, C., ... Johansen-Berg, H.  
534 (2011). Structural and functional bases for individual differences in motor learning. *Human*  
535 *Brain Mapping*, 32(3), 494–508. <https://doi.org/10.1002/hbm.21037>
- 536 Vallat, R. (2018). Pingouin: statistics in Python. *The Journal of Open Source Software*, 3(31),  
537 1026.
- 538 Van Rossum, G., & Drake Jr, F. L. (1995). *Python reference manual*. Centrum voor Wiskunde en  
539 Informatica Amsterdam.
- 540 Walker, M. P., Brakefield, T., Morgan, A., Hobson, J. A., & Stickgold, R. (2002). Practice with  
541 sleep makes perfect: Sleep-dependent motor skill learning. *Neuron*, 35(1), 205–211.  
542 [https://doi.org/10.1016/S0896-6273\(02\)00746-8](https://doi.org/10.1016/S0896-6273(02)00746-8)
- 543 Waskom, M. L. (2021). seaborn: statistical data visualization. *Journal of Open Source Software*,  
544 6(60), 3021. <https://doi.org/10.21105/joss.03021>
- 545 Wiestler, T., & Diedrichsen, J. (2013). Skill learning strengthens cortical representations of  
546 motor sequences. *ELife*, 2013(2), 1–20. <https://doi.org/10.7554/eLife.00801>
- 547 Wu, J., Srinivasan, R., Kaur, A., & Cramer, S. C. (2014). Resting-state cortical connectivity  
548 predicts motor skill acquisition. *NeuroImage*, 91, 84–90.  
549 <https://doi.org/10.1016/j.neuroimage.2014.01.026>
- 550 Zou, H., & Hastie, T. (2005). Regularization and variable selection via the Elastic Net. *Journal of*  
551 *the Royal Statistical Society, Series B*, 67, 301–320.
- 552
- 553
